# Supplementary material for: Traditional Chinese Medicine Based Acupoint Application for Asthma Treatment in Children: A Meta-Analysis and Systematic Review
Source: Hindawi journal article supplement (doi:10.1155/2022/7500056), 2022-09-26
Supplement: f1 [file 7500056.f1.zip]

Archive with 2 entries (2 files):
- PRISMA_2020_checklist (1).docx
- Search Strategy.docx
