# Supplementary material for: Traditional Chinese Medicine Based Acupoint Application for Asthma Treatment in Children: A Meta-Analysis and Systematic Review
Source: Hindawi journal article supplement (doi:10.1155/2022/7500056), 2022-09-26
Supplement: f1 [file 7500056.f1.zip › Search Strategy.docx]

| strategies in PubMed. | |
| --- | --- |
| ID | Query |
| #1 | " Acupuncture Points "[Mesh] |
| #2 | (Acupuncture Point [Title/Abstract]) OR (Acupuncture Point [Title/Abstract]) OR (Point, Acupuncture [Title/Abstract]) OR (Acupoint [Title/Abstract]) |
| #3 | #1 OR #2 |
| #4 | "Children"[Mesh] |
| #5 | (children[Title/Abstract])) OR (child [Title/Abstract]) |
| #6 | #4 OR #5 |
| #7 | " Asthma"[Mesh] |
| #8 | (Asthmas [Title/Abstract])) OR (Bronchial Asthma [Title/Abstract])) OR (Asthma, Bronchial [Title/Abstract]) |
| #9 | #7 OR #8 |
| #11 | #3 AND #6 AND #9 |
